# Supplementary material for: Effects of codoping on tin selenide nanomaterials to enhance the thermoelectric performance above the ambient temperature range
Source: Royal Society of Chemistry journal article supplement (doi:10.1039/d3tc00460k), 2023-01-01
Supplement: d3tc00460k1.pdf [file d3tc00460k1.pdf]

## Supplementary

# Effects of codoping on Tin Selenide nanomaterial to enhance thermoelectric performance above ambient temperature range

Pinaki Mandal<sup>1</sup>, Soumyajit Maitra<sup>2</sup>, Uday Kumar Ghorui<sup>3</sup>, Prasenjit Chakraborty<sup>1</sup>, Bibhutosh Adhikary<sup>3</sup> and Dipali Banerjee<sup>1\*</sup>

<sup>1</sup>Department of Physics, Indian Institute of Engineering Science and Technology (IEST), Shibpur, Howrah -711103, West Bengal, India

<sup>2</sup>School of Materials Science, Indian Association for the Cultivation of Science, Kolkata 700032, India

<sup>3</sup>Department of Chemistry, Indian Institute of Engineering Science and Technology (IEST), Shibpur, Howrah-711103, West Bengal, India

\*Email id: [dipalibanerjeebesu@gmail.com](mailto:dipalibanerjeebesu@gmail.com)

### Williamson-Hall plot

Average crystallite size (D) and lattice strain ( $\epsilon$ ) were calculated using Williamson-Hall plot (equation 1),

$$\beta \cos \theta = \frac{K\lambda}{D} + 4\epsilon \sin \theta \quad \dots\dots\dots 1$$

where  $\beta$  is full width at half maxima (FWHM), K is the shape factor (0.94), and  $\lambda$  is the wavelength, respectively

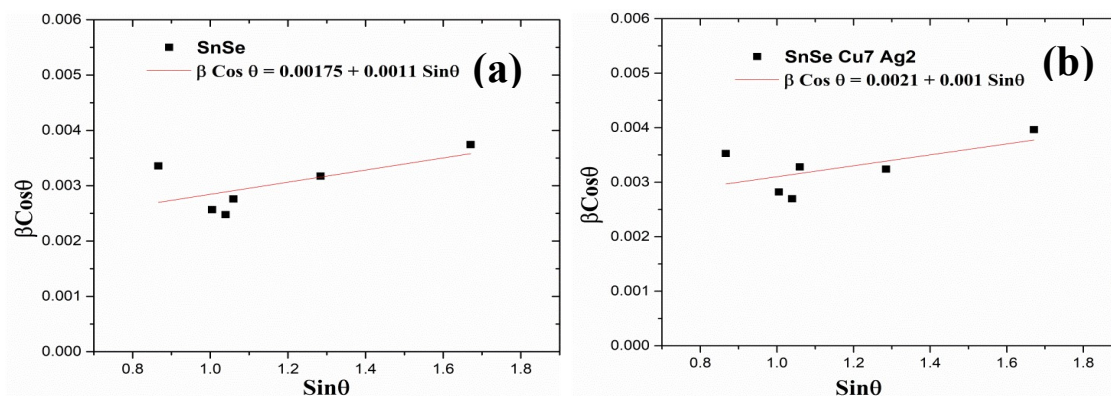

Figure S1 Williamson-Hall plots for pristine (a) SnSe and (b) SSCA-7-2

## XPS Analysis

Figure S2 is the survey XPS spectrum of Cu/Ag codoped SnSe sample (SSCA-7-2). It reveals the presence of Cu 2p, Sn 3d, Ag 3d and Se 3d in codoped sample. C and O may come from ethylenediamine and small amount of tin oxide which may form during synthesis.

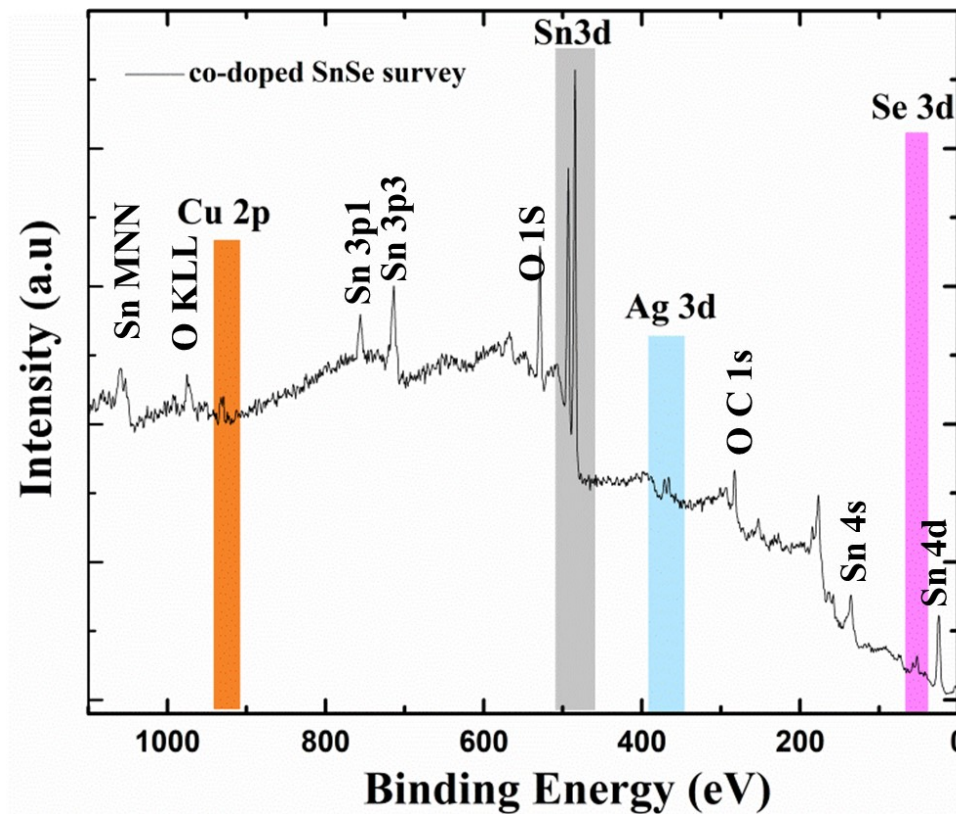

Figure S2 XPS survey scan for codoped SSCA-7-2

## UV-Vis Analysis

UV-Vis spectra (shown in figure S3) were taken for the samples pure SnSe, Cu doped SnSe (SSCA-7-0) and Cu, Ag codoped SnSe (SSCA-7-2). Corresponding optical bandgaps ( $E_g$ ) were calculated using Tauc relation<sup>1</sup> (equation 2)

$$\alpha h\nu = A_0[h\nu - E_g]^n \quad \dots\dots\dots 2$$

Where  $\alpha$ ,  $h$ ,  $\nu$  and  $A_0$  are absorption coefficient, plank constant, frequency of radiation and constant respectively. Value of  $n$  depends on type of transition like  $\frac{1}{2}$ , 2,  $\frac{1}{3}$  or 3 for allowed

direct, allowed indirect, forbidden direct, forbidden indirect transitions respectively. Obtained bandgap values are 1.05, 0.91 and 0.69 eV for pure SnSe, SSCA-7-0 and SSCA-7-2 respectively. Hence optical bandgap decreases for doped and codoped samples which is also observed in DFT results.

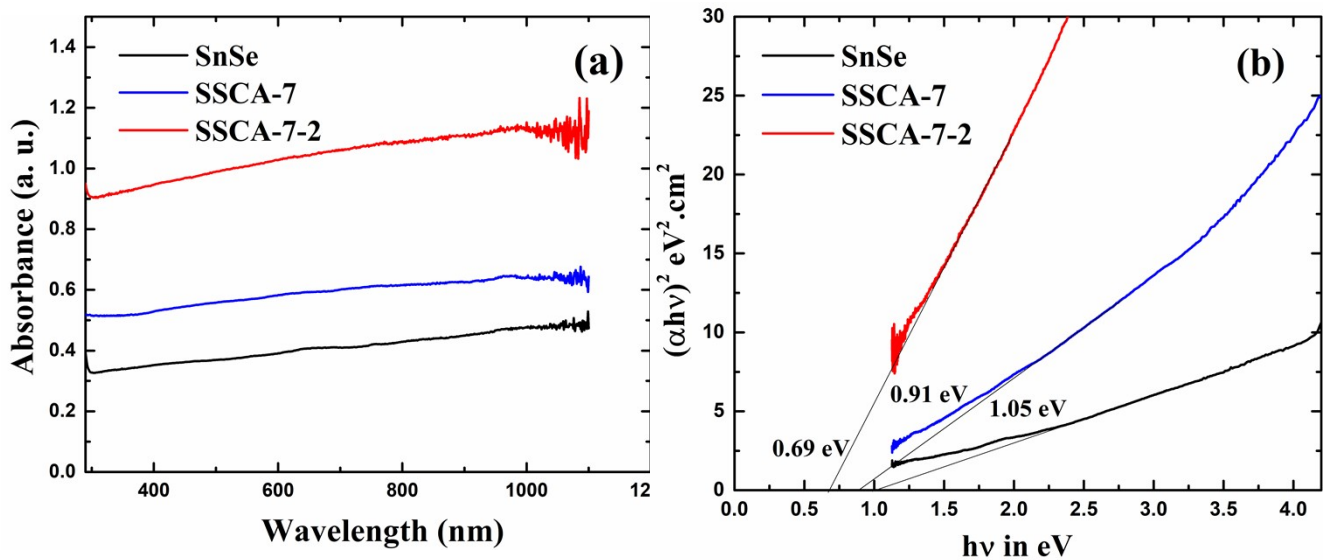

Figure S3 (a) UV-Vis spectra; (b) Tauc plot of pure SnSe, SSCA-7-0 and SSCA-7-2 respectively

### Transport parameters

Carrier concentration has been calculated using Mott–Jones equation 3 (for  $M_e=0.9$ ). Obtained values of carrier concentration and mobility are tabulated in Table S1 at room temperature along with recent similar works. Temperature variation of mobility for SSCA-7-2 has been shown in Figure S4

$$S = \frac{8\pi^2 k_B}{3eh^2} m_{DOS}^* \frac{\pi}{T(3n)^{2/3}} \dots\dots\dots 3$$

Table S1 Carrier concentration and mobility calculated from Seebeck coefficient and reported values

| Sample                                                                      | n 10 <sup>18</sup> cm <sup>-3</sup><br>from Hall<br>measurement | n in 10 <sup>18</sup> cm <sup>-3</sup><br>(Mott-Jones)<br>(m*=0.9me) | Mobility ( cm <sup>2</sup> /VS)<br>Hall measurement | Mobility ( cm <sup>2</sup> /VS)<br>Calculated from<br>Seebeck coefficient | Electrical<br>conductivity<br>S/cm | Referen<br>ce   |
|-----------------------------------------------------------------------------|-----------------------------------------------------------------|----------------------------------------------------------------------|-----------------------------------------------------|---------------------------------------------------------------------------|------------------------------------|-----------------|
| SnSe                                                                        |                                                                 | 8.28<br>5.32 (0.67 m <sub>e</sub> )                                  |                                                     | 0.0376                                                                    | 0.05                               | Present<br>work |
| SSC-3                                                                       |                                                                 | 21.9<br>15.05(m*=0.7me)<br>9.38 (m*=0.51me)                          |                                                     | 0.0872                                                                    | 0.3                                | „               |
| SSC-7                                                                       |                                                                 | 32 22.15(m*=0.7me)<br>13.77 (m*=0.51me)                              |                                                     | 0.3019                                                                    | 1.54                               | „               |
| SSCA-7-1                                                                    |                                                                 | 48.9<br>16.15 (m*=0.43me)                                            |                                                     | 0.5545                                                                    | 4.34                               | „               |
| SSCA-7-2                                                                    |                                                                 | 41.7<br>13.79 (m*=0.43me)                                            |                                                     | 0.5261                                                                    | 3.51                               | „               |
| SSCA-7-3                                                                    |                                                                 | 37.9<br>12.51 (m*=0.43me)                                            |                                                     | 0.5011                                                                    | 3.04                               | „               |
| SnSe                                                                        | 0.18                                                            | 6.78                                                                 | 160                                                 | 4.3                                                                       | 4.7                                | [2]             |
| SnSe 11.8 % Cu                                                              | 3.44                                                            | 13.71                                                                | 57.2                                                | 14.12                                                                     | 31.6                               |                 |
| SnSe                                                                        | 0.5                                                             | 27.53                                                                | 139                                                 | 2.52                                                                      | 10.12                              | [3]             |
| SnSe 5% Ag                                                                  | 9                                                               | 56.23                                                                | 13                                                  | 2.11                                                                      | 12.60                              |                 |
| SnSe                                                                        | 0.15                                                            | 8.9 (S=420 μV/K)                                                     | 56                                                  | 0.32                                                                      | 0.46                               | [4]             |
| SnSe 1% Zn                                                                  | 0.2                                                             | 5.4(S=585 μV/K)                                                      | 30                                                  | 0.57                                                                      | 0.50                               |                 |
| SnSe                                                                        | 3.8                                                             | 41.7(S=150 μV/K)                                                     | 0.22                                                | 0.007                                                                     | 0.05                               | [5]             |
| Sn <sub>0.94</sub> Pb <sub>0.01</sub> Se <sub>0.96</sub> Te <sub>0.04</sub> | 3.98                                                            | 42.1(S=149 μV/K)                                                     | 0.175                                               | 0.029                                                                     | 0.2                                |                 |
| SnSe                                                                        | 0.25                                                            | 6.8 (S=502 μV/K)                                                     | 28                                                  |                                                                           | 52                                 | [6]             |
| Na <sub>0.01</sub> (Sn <sub>1-0.05</sub> Pb <sub>0.05</sub> )<br>0.99Se     | 43.1                                                            | 41 (S=150 μV/K)                                                      | 5.7                                                 | 6.2                                                                       | 58                                 |                 |

(from Hall Effect) at room temperature

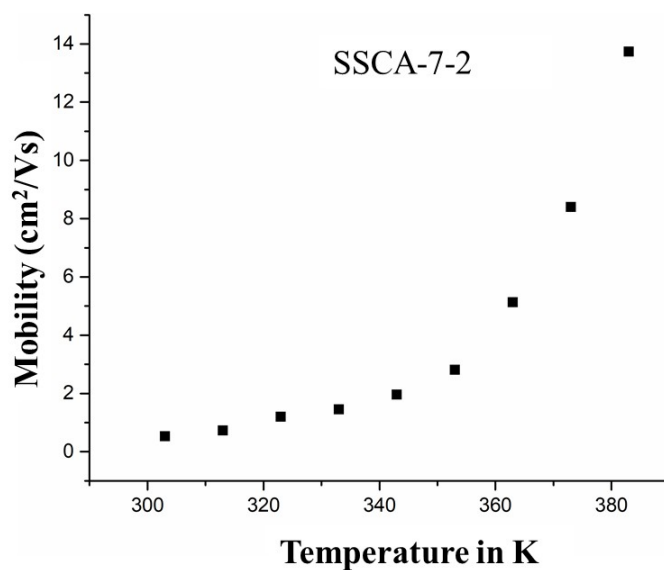

Figure S4 Temperature variation of mobility for SSCA-7-2

## Computational Details

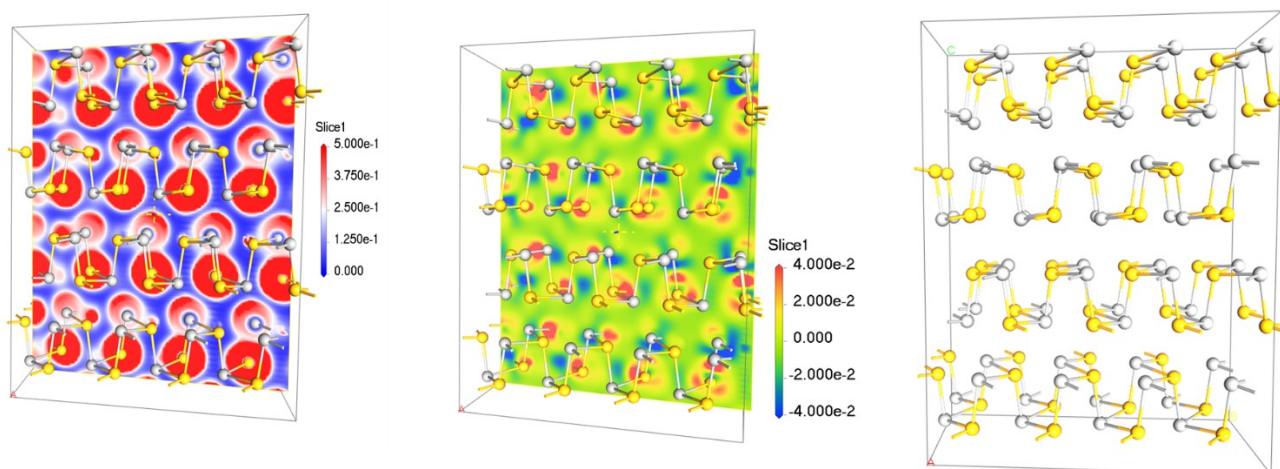

Figure S5 (a) ELF mapping of Cu-SnSe (b) EDD mapping of Cu-SnSe (c) Geometry optimized structure of SnSe supercell

DFT calculations were carried out using Quantum Espresso code using a Monkhorst Pack Scheme  $9 \times 9 \times 3$  k-point grid<sup>7</sup>. Spin-polarized DFT calculations were carried out with GGA exchange-correlation and PBE type Ultrasoft pseudopotentials and Koelling-Harmon relativistic treatment<sup>8,9</sup>. DFT-D2 correction using Grimme Parameters for interlayer VdW interactions was taken into consideration since SnSe is a layered material. SCF cutoff was set at 1e-6 eV with a density mixing electronic minimizer scheme and a Pulay-type charge mixing scheme<sup>9,10</sup>. Geometry optimization was carried out using an LBFGS algorithm with energy cutoff set at 1e-6 eV, max force at 0.005 eV/Å, max stress at 0.01 GPa, and max displacement at 1e-5 Å<sup>11,12</sup>. Phonon density of states and phonon dispersions were calculated using the Finite Displacement method for a single supercell, with convergence tolerance of 1e-6 eV and 0.005 1/Å dispersion grid separation<sup>7</sup>.

## References

- (1) Mandal, P.; Maitra, S.; Chatterjee, M. J.; Chattopadhyaya, M.; Kargupta, K.; Banerjee, D. Polypyrrole-Bismuth Selenide (PPY-Bi<sub>2</sub>Se<sub>3</sub>) Composite-Thermoelectric Characterization and Effect of Nickel Doping. *Synthetic Metals*. 2022. <https://doi.org/10.1016/j.synthmet.2022.117119>.

- (2) Shi, X.; Zheng, K.; Hong, M.; Liu, W.; Moshwan, R.; Wang, Y.; Qu, X.; Chen, Z. G.; Zou, J. Boosting the Thermoelectric Performance of P-Type Heavily Cu-Doped Polycrystalline SnSe: Via Inducing Intensive Crystal Imperfections and Defect Phonon Scattering. *Chem. Sci.* **2018**, *9* (37), 7376–7389. <https://doi.org/10.1039/c8sc02397b>.
- (3) Chien, C. H.; Chang, C. C.; Chen, C. L.; Tseng, C. M.; Wu, Y. R.; Wu, M. K.; Lee, C. H.; Chen, Y. Y. Facile Chemical Synthesis and Enhanced Thermoelectric Properties of Ag Doped SnSe Nanocrystals. *RSC Adv.* **2017**, *7* (54), 34300–34306. <https://doi.org/10.1039/c7ra05819e>.
- (4) Li, J. C.; Li, D.; Qin, X. Y.; Zhang, J. Enhanced Thermoelectric Performance of P-Type SnSe Doped with Zn. *Scr. Mater.* **2017**, *126*, 6–10. <https://doi.org/10.1016/j.scriptamat.2016.08.009>.
- (5) Li, F.; Bo, L.; Zhang, R.; Liu, S.; Zhu, J.; Zuo, M.; Zhao, D. Enhanced Thermoelectric Properties of Te Doped Polycrystalline Sn<sub>0.94</sub>Pb<sub>0.01</sub>Se. *Nanomaterials* **2022**, *12* (9), 1–11. <https://doi.org/10.3390/nano12091575>.
- (6) Lee, Y. K.; Ahn, K.; Cha, J.; Zhou, C.; Kim, H. S.; Choi, G.; Chae, S. I.; Park, J. H.; Cho, S. P.; Park, S. H.; Sung, Y. E.; Lee, W. B.; Hyeon, T.; Chung, I. Enhancing P-Type Thermoelectric Performances of Polycrystalline SnSe via Tuning Phase Transition Temperature. *J. Am. Chem. Soc.* **2017**, *139* (31), 10887–10896. <https://doi.org/10.1021/jacs.7b05881>.
- (7) Opoku, F.; Govender, K. K.; Gertina, C.; Elizabeth, C.; Govender, P. P. ( M = Zn and Cd ) Heterostructures for Hydrogen Production : Insights from a DFT + U Study †. *Phys.Chem.Chem.Phys* **2017**, *19*, 28401–28413. <https://doi.org/10.1039/c7cp04440b>.
- (8) Natarajan, K.; Chandiramouli, R. Exploring the Structural Stability and Electronic Properties of VS<sub>2</sub> Nanostructures – a DFT Study. *J. Nano- Electron. Phys.* **2018**, *9* (February), 3–7. [https://doi.org/10.21272/jnep.9\(3\).03008](https://doi.org/10.21272/jnep.9(3).03008).
- (9) Xu, Q.; Yang, G. M.; Zheng, W. T. DFT Calculation for Stability and Quantum Capacitance of MoS<sub>2</sub> Monolayer-Based Electrode Materials. *Mater. Today Commun.* **2020**, *22*, 100772–100779. <https://doi.org/10.1016/j.mtcomm.2019.100772>.
- (10) Maitra, S.; Pal, S.; Maitra, T.; Halder, S.; Roy, S. Solvothermal Etching-Assisted Phase and Morphology Tailoring in Highly Porous CuFe<sub>2</sub>O<sub>4</sub>Nanoflake Photocathodes for Solar Water Splitting. *Energy and Fuels* **2021**, *35* (17), 14087–14100. <https://doi.org/10.1021/acs.energyfuels.1c02090>.
- (11) Ghosh, D.; Roy, K.; Maitra, S.; Kumar, P. Unravelling Rashba-Dresselhaus Splitting Assisted Magneto-Photoelectrochemical Water Splitting in Asymmetric MoSSe-GaN Heterostructures. *J. Phys. Chem. Lett.* **2022**, *13* (5), 1234–1240. <https://doi.org/10.1021/acs.jpcclett.1c04153>.
- (12) Roy, K.; Maitra, S.; Ghosh, D.; Kumar, P.; Devi, P. 2D-Heterostructure Assisted Activation of MoS<sub>2</sub> Basal Plane for Enhanced Photoelectrochemical Hydrogen Evolution Reaction. *Chem. Eng. J.* **2022**, *435* (2), 134963. <https://doi.org/https://doi.org/10.1016/j.cej.2022.134963>.
